# Supplementary material for: Ex VivoEvaluation of Secretion-Clearing Device in Reducing Airway Resistance within Endotracheal Tubes
Source: Hindawi journal article supplement (doi:10.1155/2018/3258396), 2018-12-10

**SUPPLEMENTAL TABLE 1. Functionality of uncleared ETTs in relation to ETT size**

| Tube size | Percentage of ETTs in which function associates with a smaller tube size<br>(prior to clearing) |         |         |                 |         |         |
|-----------|-------------------------------------------------------------------------------------------------|---------|---------|-----------------|---------|---------|
|           | 1 size smaller                                                                                  |         |         | 2 sizes smaller |         |         |
|           | 30 slpm                                                                                         | 60 slpm | 90 slpm | 30 slpm         | 60 slpm | 90 slpm |
| 7 mm      | 0                                                                                               | 25%     | 25%     | Not Applicable  |         |         |
| 7.5 mm    | 53%                                                                                             | 65%     | 65%     | 29%             | 41%     | 35%     |
| 8 mm      | 63%                                                                                             | 74%     | 79%     | 47%             | 63%     | 63%     |

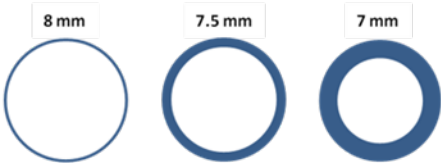

## Supplemental Figure 1

### Multi-Station Schematic of Pressure Drop Evaluation (Pre & Post Cleaning)

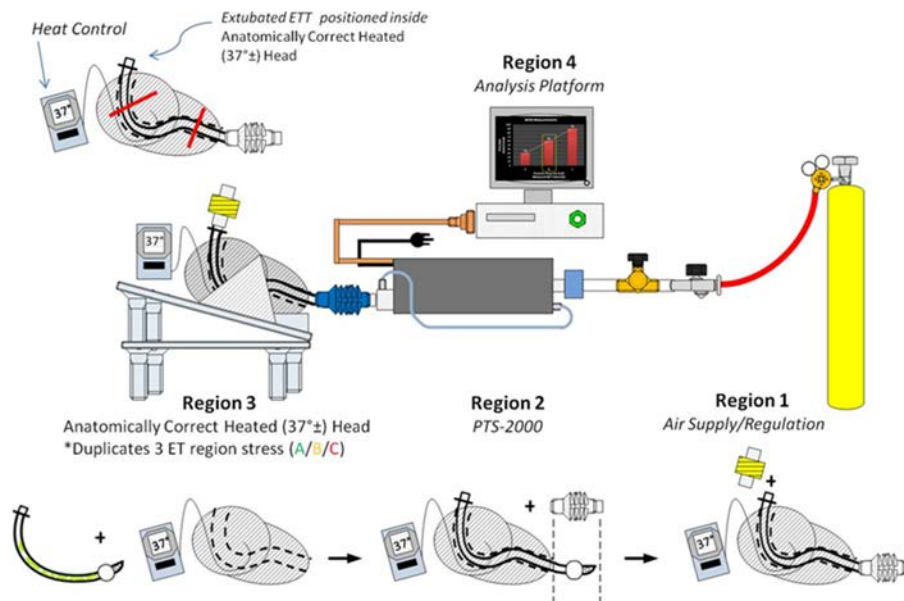

Supplemental Figure 2

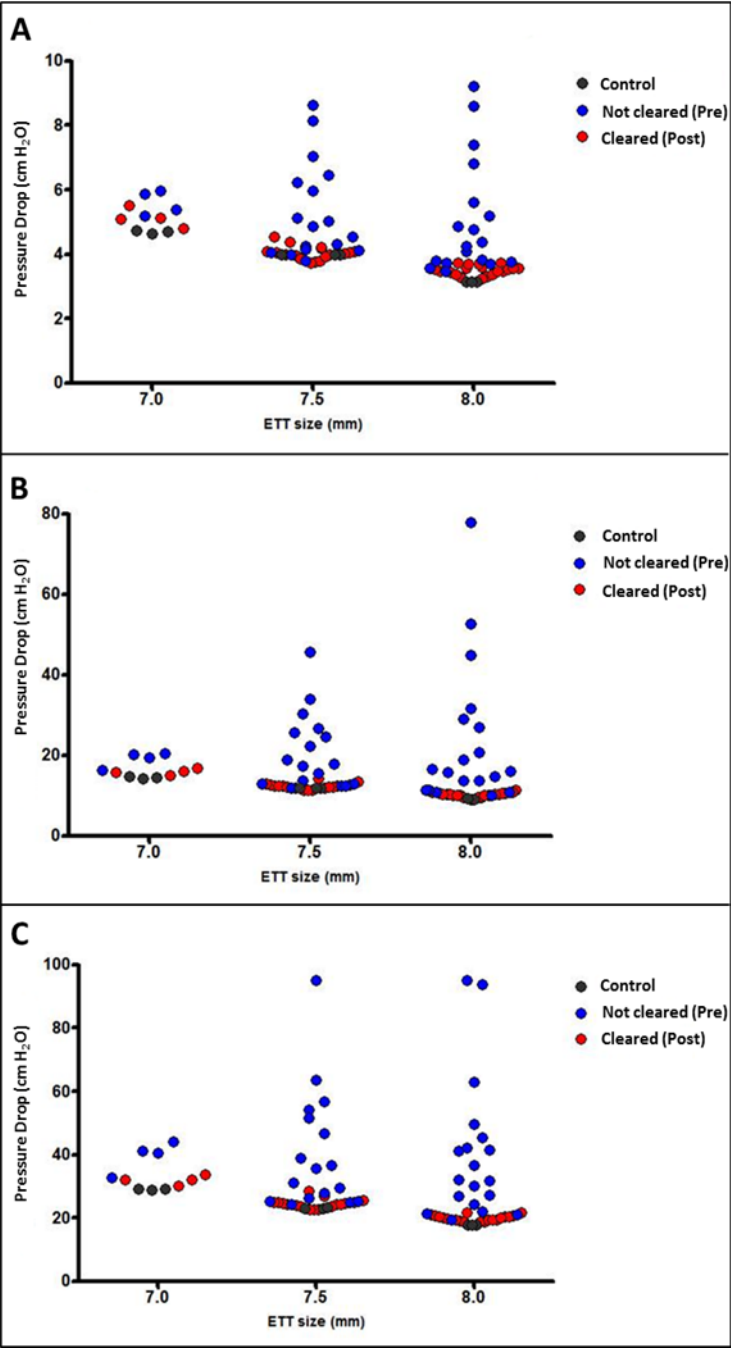

### Supplemental Figure 3

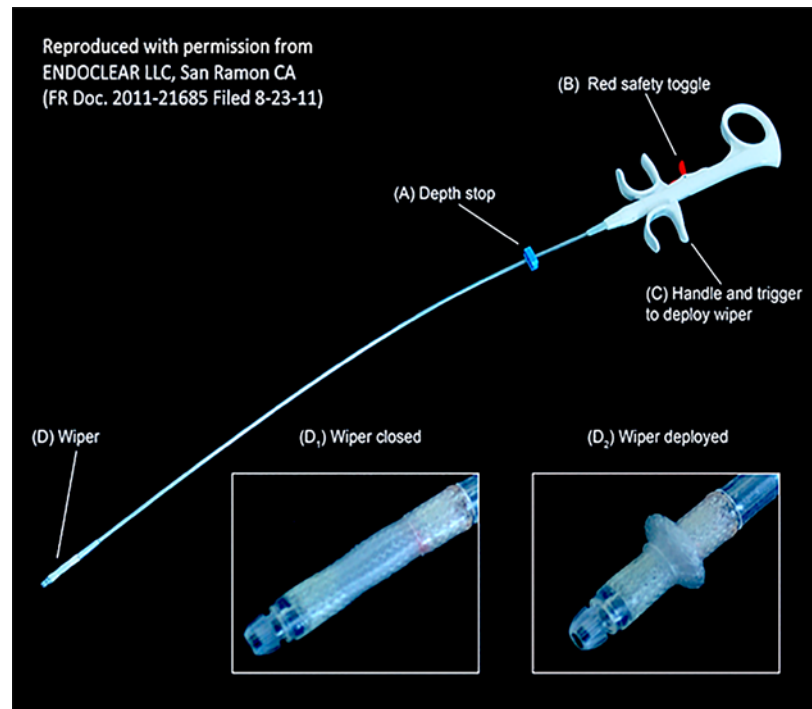

Supplemental Figure 4

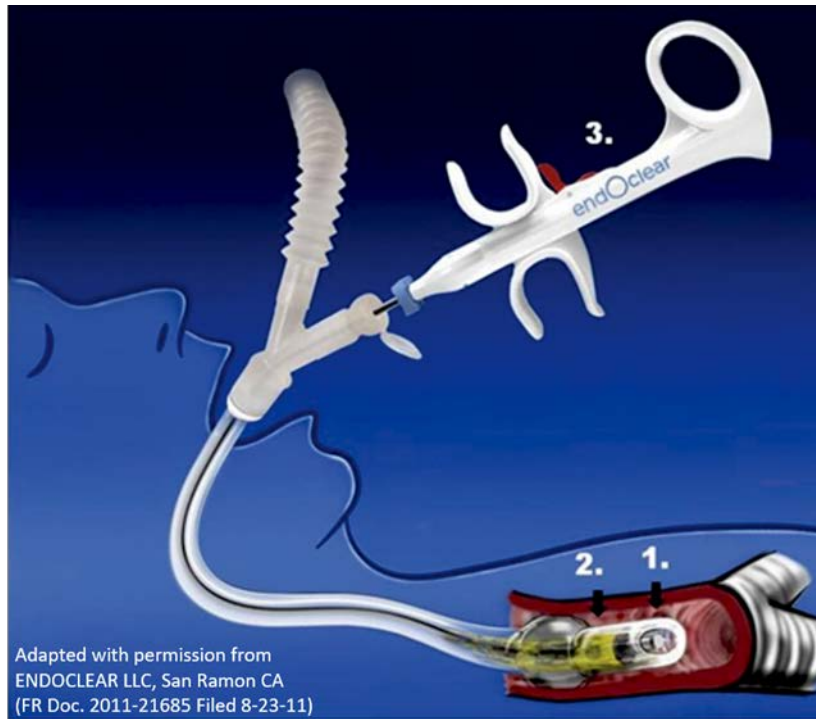

Supplemental Figure 5

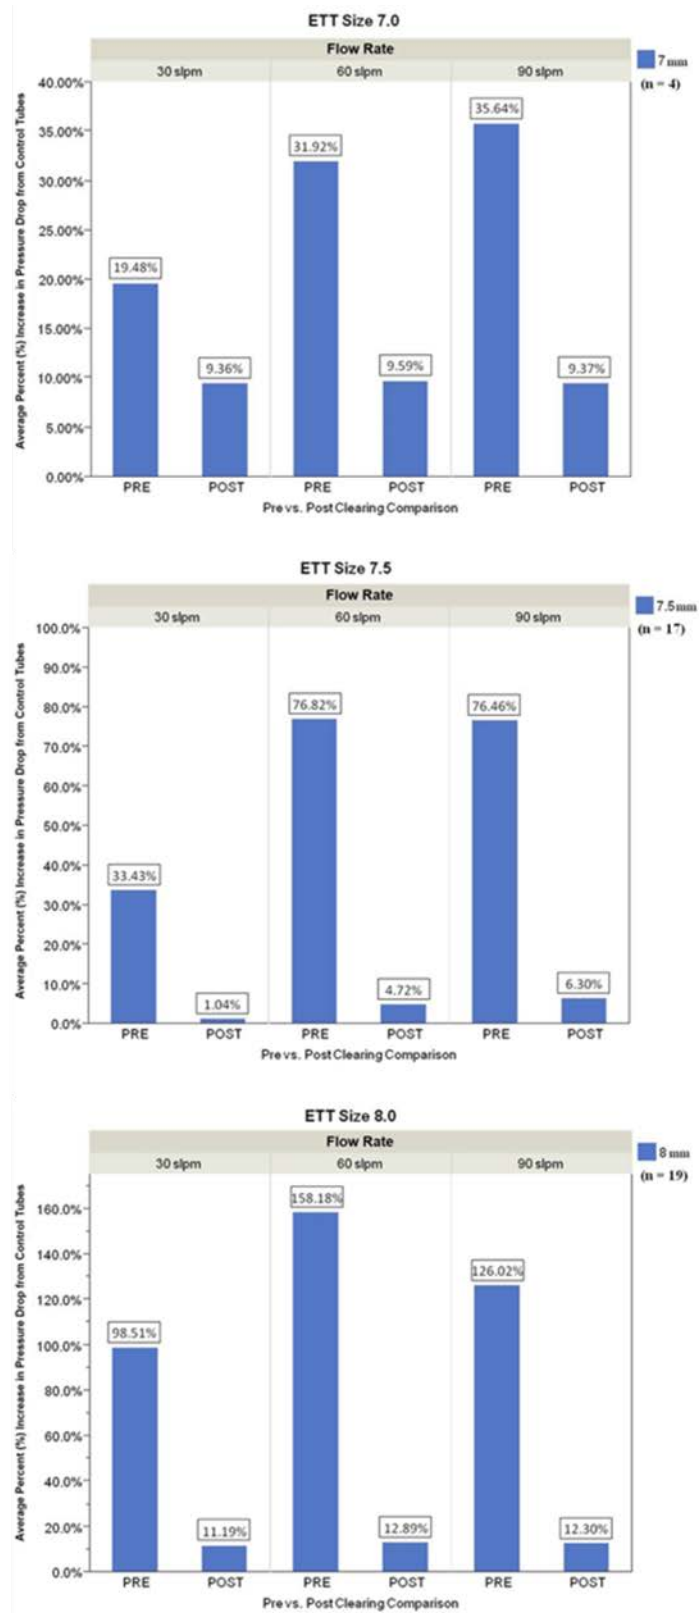

Supplement: f1 [file 3258396.f1.pdf]
